# Supplementary material for: The interpretation of glucose clamp studies of long-acting insulin analogues: from physiology to marketing and back
Source: Springer Nature journal article supplement (doi:10.1007/s00125-008-1098-5), 2008-07-31
Supplement: MOESM1 [file 8087838]

## Electronic supplementary material

**ESM Table 1** Comparability of glucose clamp studies of long-acting insulin analogues

| Clamp methodology                                      |                                                                                                                 |
|--------------------------------------------------------|-----------------------------------------------------------------------------------------------------------------|
| Biostator vs manual clamp                              | Study [reference]                                                                                               |
| Manual                                                 | Lepore 2000 [7], Plank 2005 [15], Scholtz 2005 [8], Luzio 2006 [11], Porcellati 2007 [18], Porcellati 2007 [12] |
| Biostator                                              | Heinemann 2000 [16], Heise 2004 [17], Klein 2007 [10]                                                           |
| Study design                                           |                                                                                                                 |
| Study population                                       | Study [reference]                                                                                               |
| Type 1 diabetes                                        | Lepore 2000 [7], Heise 2004 [17], Plank 2005 [15], Porcellati 2007 [18], Porcellati 2007 [12]                   |
| Type 2 diabetes                                        | Luzio 2006 [11], Klein 2007 [10]                                                                                |
| Healthy volunteers                                     | Heinemann 2000 [16], Scholtz 2005 [8]                                                                           |
| Infusion (i.v.) of human regular insulin               | Study [reference]                                                                                               |
| Started 4–6 h prior to study insulin administration    | Lepore 2000 [7], Heise 2004 [17], Plank 2005 [15], Porcellati 2007 [18], Klein 2007 [10], Porcellati 2007 [12]  |
| Gradually decreased after study insulin administration | Lepore 2000 [7], Plank 2005 [15], Porcellati 2007 [18], Porcellati 2007 [12]                                    |
| Stopped before study insulin administration            | Heise 2004 [17], Klein 2007 [10]                                                                                |
| Continuous infusion throughout the clamp               | Heinemann 2000 [16]                                                                                             |
| Not employed                                           | Scholtz 2005 [8], Luzio 2006 [11]                                                                               |
| Time of day of study insulin administration            | Study [reference]                                                                                               |
| Morning                                                | Heinemann 2000 [16], Scholtz 2005 [8], Luzio 2006 [11]                                                          |
| Noon                                                   | Heise 2004 [17], Klein 2007 [10]                                                                                |
| Evening                                                | Lepore 2000 [7], Plank 2005 [15], Porcellati 2007 [18], Porcellati 2007 [12]                                    |
| Clamp duration                                         | Study [reference]                                                                                               |
| 24 h, or the time at which the glucose concentration   | Porcellati 2007 [12]                                                                                            |

|                                                                                                                           |                                                                                                                            |
|---------------------------------------------------------------------------------------------------------------------------|----------------------------------------------------------------------------------------------------------------------------|
| reaches >10.0 mmol/l (180 mg/dl), after study insulin administration                                                      |                                                                                                                            |
| 24 h, or the time at which the glucose concentration reaches >11.1 mmol/l (200 mg/dl), after study insulin administration | Lepore 2000 [7], Heise 2004 [17], Plank 2005 [15]                                                                          |
| 24 h after study insulin administration                                                                                   | Scholtz 2005 [8], Luzio 2006 [11], Klein 2007 [10]                                                                         |
| 30 h after study insulin administration                                                                                   | Heinemann 2000 [16]                                                                                                        |
| 32 h after study insulin administration                                                                                   | Porcellati 2007 [18]                                                                                                       |
| Study insulin dose (U/kg)                                                                                                 | Study [reference]                                                                                                          |
| 0.30                                                                                                                      | Lepore 2000 [7], Porcellati 2007 [18]                                                                                      |
| 0.35                                                                                                                      | Porcellati 2007 [12]                                                                                                       |
| 0.40                                                                                                                      | Heinemann 2000 [16], Heise 2004 [17], Plank 2005 [15], Scholtz 2005 [8], Klein 2007 [10]                                   |
| 0.50                                                                                                                      | Luzio 2006 [11]                                                                                                            |
| 0.10, 0.20, 0.40, 0.80, 1.60                                                                                              | Plank 2005 [15]                                                                                                            |
| 0.40, 0.80, 1.40                                                                                                          | Klein 2007 [10]                                                                                                            |
| Single vs repeated study injections                                                                                       | Study [reference]                                                                                                          |
| Single injection                                                                                                          | Heinemann 2000 [16], Lepore 2000 [7], Heise 2004 [17], Plank 2005 [15], Scholtz 2005 [8], Luzio 2006 [11], Klein 2007 [10] |
| Repeated injections                                                                                                       | Porcellati 2007 [18], Porcellati 2007 [12]                                                                                 |
| Site of injection                                                                                                         | Study [reference]                                                                                                          |
| Thigh                                                                                                                     | Lepore 2000 [7], Heise 2004 [17], Plank 2005 [15], Porcellati 2007 [18], Klein 2007 [10], Porcellati 2007 [12]             |
| Abdomen                                                                                                                   | Heinemann 2000 [16], Scholtz 2005 [8], Luzio 2006 [11]                                                                     |
| Clamp glucose target (mmol/l) [mg/dl]                                                                                     | Study [reference]                                                                                                          |
| 5.0 [90]                                                                                                                  | Heinemann 2000 [16], Klein 2007 [10]                                                                                       |
| 5.6 [100]                                                                                                                 | Heise 2004 [17], Porcellati 2007 [12]                                                                                      |
| 7.2 [130]                                                                                                                 | Lepore 2000 [7], Plank 2005 [15], Porcellati 2007 [18]                                                                     |
| Baseline glucose concentration                                                                                            | Scholtz 2005 [8], Luzio 2006 [11]                                                                                          |

| Outcome measures                                                                                                                           |                                                                                                                                                       |
|--------------------------------------------------------------------------------------------------------------------------------------------|-------------------------------------------------------------------------------------------------------------------------------------------------------|
| GIR-AUC, $GIR_{max}$ , $t_{GIRmax}$                                                                                                        | Study [reference]                                                                                                                                     |
| GIR-AUC, $GIR_{max}$ and $t_{GIRmax}$                                                                                                      | Heinemann 2000 [16], Heise 2004 [17], Plank 2005 [15], Scholtz 2005 [8], Luzio 2006 [11], Klein 2007 [10], Porcellati 2007 [12]                       |
| GIR-AUC                                                                                                                                    | Porcellati 2007 [18]                                                                                                                                  |
| Not specifically reported                                                                                                                  | Lepore 2000 [7]                                                                                                                                       |
| Onset of action                                                                                                                            | Study [reference]                                                                                                                                     |
| The time after study insulin administration at which the rate of i.v. insulin was reduced by 50%                                           | Lepore 2000 [7], Plank 2005 [15], Porcellati 2007 [18]                                                                                                |
| The time after study insulin administration at which i.v. glucose was started                                                              | Porcellati 2007 [12]                                                                                                                                  |
| The time of study insulin administration                                                                                                   | Klein 2007 [10]                                                                                                                                       |
| Not defined                                                                                                                                | Heinemann 2000 [16], Heise 2004 [17], Scholtz 2005 [8], Luzio 2006 [11]                                                                               |
| End of action                                                                                                                              | Study [reference]                                                                                                                                     |
| The time after study insulin administration at which the glucose concentration reached $>8.3$ mmol/l (150 mg/dl), or end of clamp          | Lepore 2000 [7], Plank 2005 [15], Porcellati 2007 [18], Porcellati 2007 [12]                                                                          |
| The time after study insulin administration at which $GIR < 0.00275$ mmol $kg^{-1} min^{-1}$ (0.5 mg $kg^{-1} min^{-1}$ ), or end of clamp | Klein 2007 [10]                                                                                                                                       |
| Not defined                                                                                                                                | Heinemann 2000 [16], Heise 2004 [17], Scholtz 2005 [8], Luzio 2006 [11]                                                                               |
| Statistical methods                                                                                                                        |                                                                                                                                                       |
| Averaging                                                                                                                                  | Study [reference]                                                                                                                                     |
| Mean time–action profile                                                                                                                   | Heinemann 2000 [16], Lepore 2000 [7], Plank 2005 [15], Scholtz 2005 [8], Luzio 2006 [11], Porcellati 2007 [18], Klein 2007 [10], Porcellati 2007 [12] |
| Individual time–action profiles                                                                                                            | Heise 2004 [17]                                                                                                                                       |
